# Supplementary material for: Comparing the accuracy of wearable devices readings with cuff sphygmomanometers for blood pressure measurement: Systematic Review and Meta-analysis
Source: Research Square preprint supplement (doi:10.21203/rs.3.rs-3784165/v1), 2024-01-31
Supplement: Supplementary file 1 [file a4957fdbed14233a107c3c74.xlsx]

## Sheet: Sheet1
Source	Location	Study Type	Age, y, Mean (SD)	BMI, Mean (SD)	Sample Size, No.	Males, No. (%)	Wearable devices	Wearable devices		Cuffed devices	WBP, Mean±SD, mm Hg		CBP, Mean±SD, mm Hg
								measurement sites	measurement technologies		SBP1	DBP1	SBP2	DBP2
Ali A. Aboughaly,15 2017	German University Cairo, Egypt	prospective clinical trial	44.1(20.2)	NA	30	19 (63.3%)	a Non-Invasive Cuff-less Blood Pressure Monitor (NICBPM)	wrist	PPG and ECG	the automated oscillometric system (model BP101A, cuff-based apparatus)	118.6±11.19	NA	118±12	79±14
C.C.Y. Poon,32 2005	Hong Kong, China	prospective clinical trial	57(29)	NA	85	36(42%)	a stainless steel electrodes and a pair of light emitting diode and photodetector (IR91-21C and IR91-21B, Everlight, Taiwan)	finger	PPG and ECG	an automatic BP meter (Colin BP-8800, Japan and Omron HEM-907, Japan)	122±21	64±9	122±21	63±9
Erez Kachel,20 2021(1)	Tiberias, Israel	prospective, comparative clinical trial	60(15)	26.9(2.6)	10	6(60%)	a chest-patch	chest	PPG	an AL (AB-0023 Art-LineTM Kits Single Channel, Biometrix, Gronsveld, The Netherlands, and IntelliVue MX500 Patient Monitor, Philips Medical Systems)	120±15	61±9	120±14	61±8
Erez Kachel,20 2021(2)	Tiberias, Israel	prospective, comparative clinical trial	60(15)	26.9(2.6)	10	6(60%)	a wrist watch	wrist	PPG	an AL (AB-0023 Art-LineTM Kits Single Channel, Biometrix, Gronsveld, The Netherlands, and IntelliVue MX500 Patient Monitor, Philips Medical Systems)	120±15	61±9	120±14	61±8
F. Scalise,36 2019	Monza, ITALY	prospective clinical trial	NA	NA	100	NA	a new cuffless BP device(CL-BP, Rooti RX, Rooti LabsÔ)	NA	ECG	a standard device (C-BP, SpacelabsÔ 90207)	131.1±15.9	80.2±9.7	125.4±10.9	75±8.3
Fen Miao,26 2020	Shenzhen, Guangdong, China	prospective clinical trial	NA	NA	30	NA	one-channel ECG signals	NA	ECG	A monitoring system (Mindray N12, Shenzhen, China)	136.85±18.65	72.67±5.93	137.07±19.54	73.42±8.17
Hakuo Takahashi,33 2021	Mukou City, Kyoto, Japan	prospective clinical trial	50(11.7)	NA	86	38(44%)	Omron HEM-7600T blood pressure measuring device	upper arm	oscillometry	the standard mercury sphygmomanometer	129.4±22.24	84±15.92	130±23.2	83±17.2
Jing Liu,25 2020	Hong Kong, China	prospective clinical trial	70.2(5.4)	23.2(3.2)	22	17(77%)	a wearable MWPPG prototype device	finger	MWPPG	a mercury sphygmomanometer with double-tube stethoscope.	129.24±11.49	65.0±7.41	127.8±13.4	66.0±10.0
Jong Hyeon Ahn,16 2021	Seoul, South Korea	prospective clinical trial	66.9(9.1)	23.6(3.3)	56	33 (58.9%)	a smartwatch (SM-R850, Samsung Electronics, Suwon, Gyeonggi, South Korea)	wrist	PPG	an aneroid sphygmomanometer (reference device, ri-san;Rudolf Riester, Jungingen, Germany)	118.9±22.76	77.5±16.57	118.6±23.2	76.3±17.2
Joon Ho Moon,27 2020	Seoul, South Korea	prospective clinical trial	57.1(17.9)	25.6(3.9)	35	17(49%)	the InBodyWATCH	both wrists	PPG and ECG	a manual sphygmomanometer (BPBIO220, InBody Co., Ltd.)	129.4±22.8	69.5±11.5	127.2±20.9	69.7±12.3
Kazuomi Kario,21 2019	Tochigi, Japan	prospective clinical trial	66.1(10.8)	23.4(4.8)	50	30(60%)	a wrist-worn watch-type oscillometric BP monitoring (WBPM) device	wrist	oscillometry	an ambulatory BP monitoring (ABPM) device, A&D TM-2441	132.8±17.4	78.9±10.3	132.0±17.1	82.1±9.7
LiangYe Li,24 2020	Wuhan, China	prospective clinical trial	NA	NA	17	3(18%)	a wearable blood pressure monitoring wristband based on optical fiber	wrist	PTT	the commercial blood pressure (BP) monitor OMRON HEM-8102A (an intelligent electronic sphygmomanometer)	114±6.66	66.35±5.35	113.76±7.35	66.24±6.03
Mitsuo Kuwabara,34 2019(1)	Shimotsuke, Tochigi, Japan	prospective clinical trial	58.8(11.6)	NA	85	47(55%)	the Omron HEM-6410T-ZM	wrist	oscillometry	a standard mercury sphygmomanomete	125.4±18.72	76.2±13.15	126.3±20.2	77.3±14.5
Mitsuo Kuwabara,34 2019(2)	Shimotsuke, Tochigi, Japan	prospective clinical trial	54.9(12.0)	NA	85	42(49%)	the Omron HEM-6410T-ZL	wrist	oscillometry	a standard mercury sphygmomanomete	129.7±18.73	81±10.84	127.3±20.1	80.3±12.9
Mitsuo Kuwabara,35 2020	Shimotsuke, Tochigi, Japan	prospective clinical trial	54.6(13.3)	NA	85	44(52%)	the Omron HEM-9601T	wrist	oscillometry	a calibrated mercury sphygmomanometer	126.4±20.89	80.8±13.52	125.2±22.0	79.7±14.6
Sang-Suk Lee,23 2011	Wonju, Korea	prospective clinical trial	NA	NA	13	NA	a cuffless wrist-wearable pulsimeter with a Hall device	wrist	Hall device	electronic or mercury liquid BP meters.	137.82±2.04	68.04±1.61	137.31±4.21	71.31±4.94
Sheikh Mohammed Shariful Islam,19 2020	Burwood, Australia	prospective clinical trial	20.3(5.4)	23.6(3.3)	20	10(50%)	a wearable BP monitoring device (Tmart Technologies)	NA	NA	an ambulatory BP device (Model TM-2430; A & D Medical Corp)	125±5	77±9	126±10	75±6
Siraporn Sakphrom,28 2021	Nakhon Si Thammarat, Thailand	prospective clinical trial	NA	NA	60	NA	a smart devices (PRO)	wrist	NA	standard medical equipment of OMRON HEM-7130	90.85±10.77	61.48±7.82	90.63±11.35	61.37±7.88
Sugondo Hadiyoso,18 2021	Bandung, Indonesia	prospective clinical trial	NA	NA	10	NA	the commercial wrist digital BP meter from Sunrom	wrist	oscillometry	Omron 7120	119.5±17.88	80.7±10.57	119.9±15.69	84.9±11.87
Syed Ghufran Khalid,22 2018	Chelmsford, UK	prospective clinical trial	NA	NA	32	NA	Raw PPG signal waveforms	NA	PPG	noninvasive BP (NIBP) data	109.1±12.8	59.8±7.2	108.9±16.8	59.2±9.4
Tessa S Schoot,29 2016	Nijmegen, Netherlands	prospective clinical trial	54.1(14.5)	NA	37	18（49%）	the Checkme Health Monitor (Viatom Technology)	finger	NA	the validated Vital Signs Monitor 300 series (Welch Allyn, Skaneateles Falls, NY, USA)	138.4±25.2	NA	136.6±21.8	NA
Xiangyu Fan,17 2018(1)	Hong Kong, China	prospective clinical trial	NA	NA	12	NA	a wearable liquid-capsule sensor platform embedded	wrist	LCPS and ECG	cuff-based device	113.6±3.0	71.0±1.5	113.4±2.4	73.8±2.2
Xiangyu Fan,17 2018(2)	Hong Kong, China	prospective clinical trial	NA	NA	12	NA	a wearable liquid-capsule sensor platform embedded	wrist	PPG and ECG	cuff-based device	113.4±2.5	70.9±1.3	113.4±2.4	73.8±2.2
Yiming Zhang,30 2020	Hangzhou, China	prospective clinical trial	27.96(7.12)	NA	22	15(68%)	a cuff-less monitoring device	finger	PPG and ECG	the Omron-8713 electronic sphygmomanometer	112.492±8.75	74.425±7.26	112.49±12.23	74.42±9.87
Abbreviations: BMI, body mass index (calculated as weight in kilograms divided by height in meters squared); PPG, photoplethysmography; ECG, electrocardiograph; MWPPG, multi-wavelength photoplethysmography; PTT, pulse transit time; LCPS, liquid-capsule pressure sensor; WBP, wearable devices blood pressure; CBP, cuffed devices blood pressure; SBP, systolic blood pressure; DBP, diastolic blood pres…
